# Supplementary material
Source: PubMed Central journal article supplement (PMC8254518)

Figure S1

a

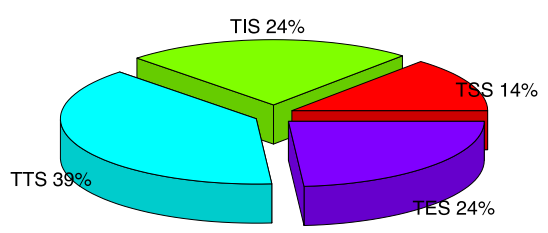

b

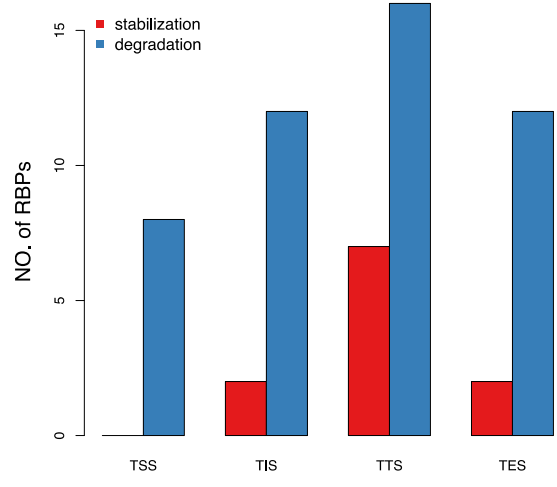

c

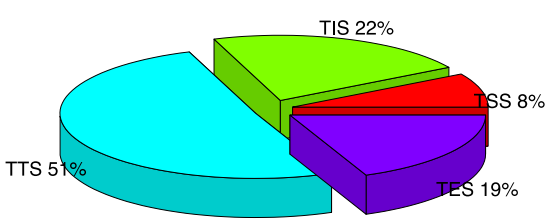

d

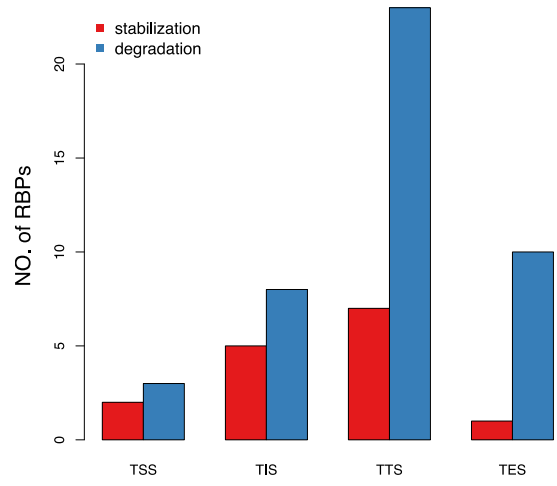

e

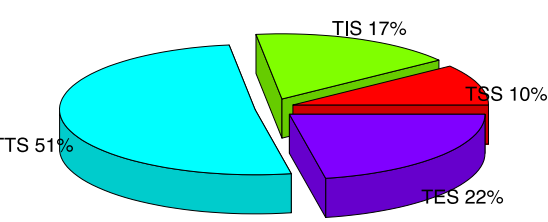

f

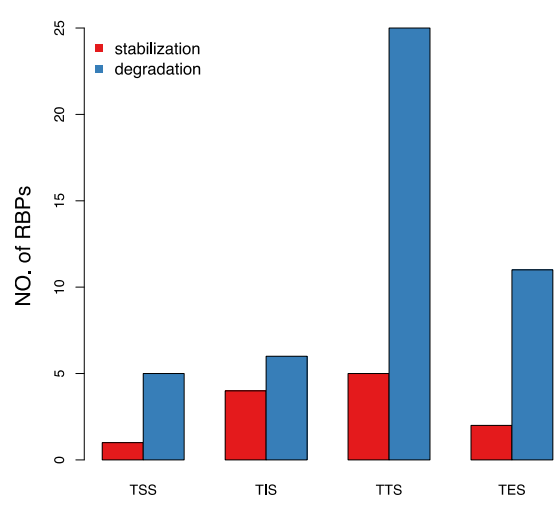

Figure S2

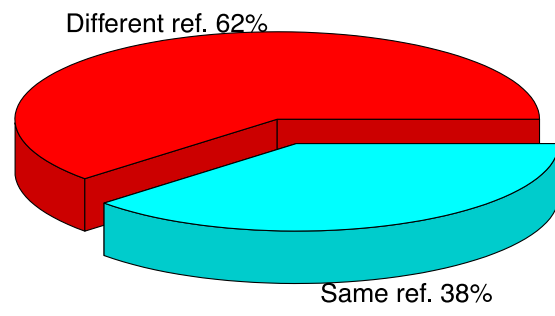

Figure S3

a

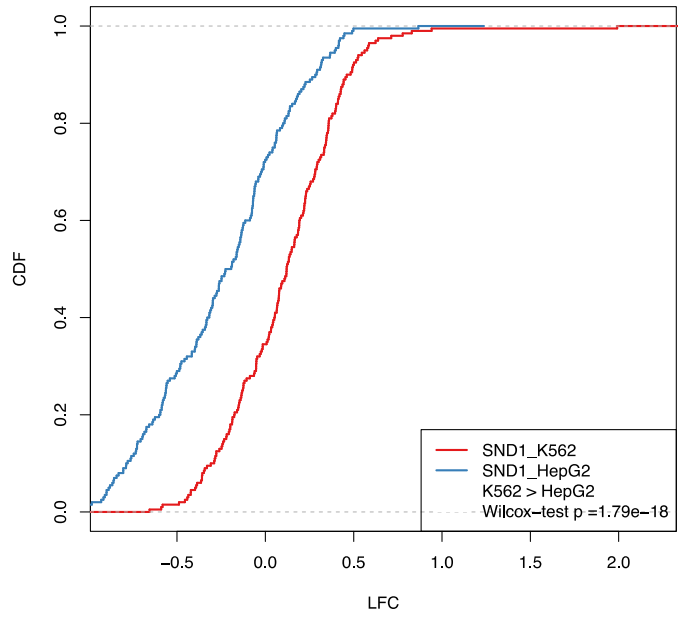

b

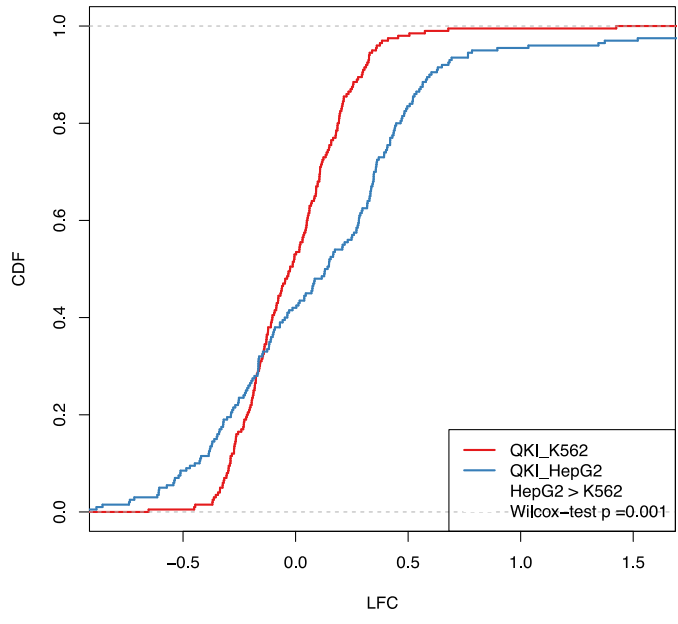

Supplement: NIHMS1611708-supplement-Supplementary_Material_1.pdf [file NIHMS1611708-supplement-Supplementary_Material_1.pdf]
